# Supplementary material for: P63 modulates the expression of theWDFY2gene which is implicated in cancer regulation and limb development
Source: Oxford University Press journal article supplement (doi:10.1042/bsr20192114), 2019-12-01
Supplement: bsr-2019-2114_supp.pdf [file bsr-2019-2114_supp.pdf]

## Supplementary Materials and Methods

### Cloning of yeast $\Delta$ Np63 $\gamma$ and TAp63 $\gamma$ isoforms expression vectors

Unexpectedly, by sequencing the original pCDNA3 plasmids, we highlighted a C-terminal deletion of 12 bps in *TP63 $\gamma$*  coding sequence, as described by Klein and co-workers [1]. Therefore, in order to clone the  $\Delta$ Np63 $\gamma$  and TAp63 $\gamma$  isoforms we designed two PCR primers encompassing the p63 coding sequence from nucleotide 1140 to nucleotide 1170 downstream the C-terminal deletion (Supplementary Table 1). Forward primer was paired with a  $\gamma$ -Cter primer having a 5' homology to a XhoI/NotI (NEB, Ipswich, Massachusetts, USA) double digested yeast expression vector (pTS-based) and a 3' homology to *TP63 $\gamma$*  cDNA (Supplementary Table 1) in a PCR reaction (PCR A) with the above described pCDNA3 plasmids as template. Reverse primer was paired with  $\Delta$ N-Nter or TA-Nter primer (Supplementary Table 1) [both having a 5' homology to the XhoI/NotI double digested yeast expression vector (pTS-based) and a 3' homology to  $\Delta$ N or TATP63 cDNA] in a PCR reaction with pCDNA3.1  $\Delta$ N or TAp63 $\alpha$  plasmid as template (PCR B and C, respectively). The PCR conditions were used as described in Marengo et al. [2]. Unpurified mixtures of PCR products (A+B or A+C) were then transformed in yIG397 yeast strain together with the XhoI/NotI digested pTS-based vector, exploiting the sequence homology at the end of the fragments (Gap Repair Assay) [3]. Plasmid DNA was recovered from yeast colonies, expanded in *E. coli*, and checked by restriction enzymes digestion; the presence of the correct  $\Delta$ Np63 $\gamma$  and TAp63 $\gamma$  coding sequence was verified by DNA sequencing (BMR Genomics, Padua, Italy). Yeast vectors expressing  $\Delta$ Np63 $\gamma$  and TAp63 $\gamma$  isoform under the inducible *GAL1,10* promoter (pTSG-based) were constructed as previously described [4].

### Collection of clinical cases

The proposita is a 1-year-old girl born at term by cesarian section from non-consanguineous parents. A threatened miscarriage in the first trimester of pregnancy was referred; exposure to

drugs, smoke, alcohol or infections during pregnancy were denied. Ultrasonography at 20 weeks of pregnancy revealed the presence of a right clubfoot. At birth, her weight was 4.150 kg (90<sup>th</sup>-95<sup>th</sup> percentile), and her length was 50 cm (50<sup>th</sup>-75<sup>th</sup> percentile); occipitofrontal circumference and Apgar score were not reported. Perinatal period and psychomotor development were normal.

At the time of consultation, at the age of 1 year, the proposita showed cleft of the right hand with complete cutaneous syndactyly of the 3<sup>d</sup> and 4<sup>th</sup> finger; short and extremely hypoplastic right tibia with homolateral clubfoot was also evident. Skin, nails, and sweating were normal. At the physical examination, the father of the proposita was found to carry defects of the right-hand central rays, with cleft hand surgically corrected and absence of the 3<sup>d</sup> finger with thinned 3<sup>d</sup> metacarpal bone. Feet were normal. At the physical examination, the mother appeared to be normal; no recurrence of malformations, mental retardation or other conditions were referred in the families of both parents.

The central rays' defects of the hand were classified as "split hand malformation"; in the proposita, this malformation was associated with a marked tibia hypoplasia. The clinical picture suggested in the proposita a diagnosis of SHFLD (Split-hand/foot malformation with long-bone deficiency).

## SUPPLEMENTARY TABLES

**Supplementary Table 1.** Sequences of the oligonucleotides used in the present study are reported, with the indication of their specific application.

---

### Cloning of p63 $\gamma$ isoforms

p63 1140-1170 forward: 5'-**aacacacatggtatccagatgacatccatc**-3'

p63 1140-1170 reverse: 5'-**gatggatgcatctggataccatgtgtgtgtt**-3'

p63  $\gamma$ -Cter: 5'-gacataactaattacatgatgggtggcggccgctctagaactagtggatcc**ctatgggtacactgatcggtt**-3'

p63  $\Delta$ N-Nter: 5'-caagctataccaagcatacaatcaactatctcatatacagttaactcgagat**gtgtgtacctggaaaacaat**-3'

p63 TA-Nter: 5'-caagctataccaagcatacaatcaactatctcatatacagttaactcgagat**gtcccagagcacacagaca**-3'

---

### Generation and mutagenesis of the mammalian reporter constructs

Pr3300 WDProm-3F: 5'-ACTTGTGCTGGTCACAGCA-3'

Pr3300 WDProm-2R: 5'-ATCTGGTATCCCAATGCGCG-3'

+12.5 RE WD-F: 5'-GGATCCTACGGAGAAGAAGCGGTCC-3'

+12.5 RE WD-R: 5'-GGATCCTGACAATGATCTATACTTCCAC-3'

del-3.3 REas: 5'-GTCAAGATATTGGGCTGGAAATATCTTGTGTTAGGAGCTTGAGTTTTAA-3'

del-3.3 REs: 5'-TTAAAACCTCAAGCTCCTAAACAAGATATTTCCAGCCCAATATCTTGAC-3'

del-0.5 REas: 5'-GCCCAACTCGTTGGCGGGCTACCTGG-3'

del-0.5 REs: 5'-CCAGGTAGCCCGCCAACGAGTTGGGC-3'

---

### Endogenous gene analysis

WDFY2 forward: 5'-GTGATCGTGCCCAAAGAGGA-3'

WDFY2 reverse: 5'-TCGTCACTCTGCTCTGATGC-3'

GAPDH forward: 5'-TCCAAAATCAAGTGGGGCGA-3'

GAPDH reverse: 5'-AGTAGAGGCAGGGATGATGT-3'

YWHAZ forward: 5'-ACTTTTGGTACTTTGTGGCTTCAA-3'

YWHAZ reverse: 5'-CCGCCAAGGGACAAACCAGTAT-3'

---

The nucleotides in **bold** correspond to the sequences that are complementary to *TP63* cDNA. The nucleotides underlined correspond to the sequence of BamHI restriction site that was added to the oligonucleotides for RE amplification.

**Supplementary Table 2.** Statistical analyses regarding the data showed in the main Figures.

| -7.6 RE (Figure 1)     | p53    | $\Delta$ Np63 $\alpha$ | $\Delta$ Np63 $\beta$ | TAp63 $\alpha$ | TAp63 $\beta$ |
|------------------------|--------|------------------------|-----------------------|----------------|---------------|
| p53                    | -      | 0.0002                 | 0.0035                | 0.0018         | 0.0002        |
| $\Delta$ Np63 $\alpha$ | 0.0002 | -                      | 0.0008                | 0.0001         | 0.0301        |
| $\Delta$ Np63 $\beta$  | 0.0035 | 0.0008                 | -                     | 0.0001         | 0.0004        |
| TAp63 $\alpha$         | 0.0018 | 0.0001                 | 0.0001                | -              | <0.0001       |
| TAp63 $\beta$          | 0.0002 | 0.0301                 | 0.0004                | <0.0001        | -             |

| -3.3 RE (Figure 1)     | p53     | $\Delta$ Np63 $\alpha$ | $\Delta$ Np63 $\beta$ | TAp63 $\alpha$ | TAp63 $\beta$ |
|------------------------|---------|------------------------|-----------------------|----------------|---------------|
| p53                    | -       | NS                     | <0.0001               | <0.0001        | 0.0003        |
| $\Delta$ Np63 $\alpha$ | NS      | -                      | <0.0001               | <0.0001        | 0.0002        |
| $\Delta$ Np63 $\beta$  | <0.0001 | <0.0001                | -                     | 0.0002         | <0.0001       |
| TAp63 $\alpha$         | <0.0001 | <0.0001                | 0.0002                | -              | <0.0001       |
| TAp63 $\beta$          | 0.0003  | 0.0002                 | <0.0001               | <0.0001        | -             |

| -0.5 RE (Figure 1)     | p53     | $\Delta$ Np63 $\alpha$ | $\Delta$ Np63 $\beta$ | TAp63 $\alpha$ | TAp63 $\beta$ |
|------------------------|---------|------------------------|-----------------------|----------------|---------------|
| p53                    | -       | 0.0031                 | NS                    | 0.0013         | <0.0001       |
| $\Delta$ Np63 $\alpha$ | 0.0031  | -                      | 0.0026                | <0.0001        | 0.0006        |
| $\Delta$ Np63 $\beta$  | NS      | 0.0026                 | -                     | <0.0001        | <0.0001       |
| TAp63 $\alpha$         | 0.0013  | <0.0001                | <0.0001               | -              | <0.0001       |
| TAp63 $\beta$          | <0.0001 | 0.0006                 | <0.0001               | <0.0001        | -             |

| +12.5 RE (Figure 1)    | p53     | $\Delta$ Np63 $\alpha$ | $\Delta$ Np63 $\beta$ | TAp63 $\alpha$ | TAp63 $\beta$ |
|------------------------|---------|------------------------|-----------------------|----------------|---------------|
| p53                    | -       | <0.0001                | <0.0001               | <0.0001        | <0.0001       |
| $\Delta$ Np63 $\alpha$ | <0.0001 | -                      | <0.0001               | 0.0002         | <0.0001       |
| $\Delta$ Np63 $\beta$  | <0.0001 | <0.0001                | -                     | <0.0001        | <0.0001       |
| TAp63 $\alpha$         | <0.0001 | 0.0002                 | <0.0001               | -              | <0.0001       |
| TAp63 $\beta$          | <0.0001 | <0.0001                | <0.0001               | <0.0001        | -             |

| +14.5 RE (Figure 1)    | p53     | $\Delta$ Np63 $\alpha$ | $\Delta$ Np63 $\beta$ | TAp63 $\alpha$ | TAp63 $\beta$ |
|------------------------|---------|------------------------|-----------------------|----------------|---------------|
| p53                    | -       | 0.0081                 | NS                    | <0.0001        | <0.0022       |
| $\Delta$ Np63 $\alpha$ | 0.0081  | -                      | <0.0001               | <0.0001        | 0.0101        |
| $\Delta$ Np63 $\beta$  | NS      | <0.0001                | -                     | <0.0001        | 0.0006        |
| TAp63 $\alpha$         | <0.0001 | <0.0001                | <0.0001               | -              | <0.0001       |
| TAp63 $\beta$          | 0.0022  | 0.0101                 | 0.0006                | <0.0001        | -             |

| Figure 2B              | p53       | $\Delta$ Np63 $\alpha$ | $\Delta$ Np63 $\beta$ | $\Delta$ Np63 $\gamma$ | TAp63 $\alpha$ | TAp63 $\beta$ | TAp63 $\gamma$ |
|------------------------|-----------|------------------------|-----------------------|------------------------|----------------|---------------|----------------|
| p53                    | -         | 0.0145                 | 0.0323                | 0.0236                 | Not quite      | NS            | NS             |
| $\Delta$ Np63 $\alpha$ | 0.0145    | -                      | Not quite             | NS                     | 0.0409         | 0.0080        | 0.0034         |
| $\Delta$ Np63 $\beta$  | 0.0323    | Not quite              | -                     | NS                     | NS             | 0.0235        | 0.0061         |
| $\Delta$ Np63 $\gamma$ | 0.0236    | NS                     | NS                    | -                      | NS             | 0.0108        | 0.0020         |
| TAp63 $\alpha$         | Not quite | 0.0409                 | NS                    | NS                     | -              | Not quite     | 0.0257         |
| TAp63 $\beta$          | NS        | 0.0080                 | 0.0235                | 0.0108                 | Not quite      | -             | NS             |
| TAp63 $\gamma$         | NS        | 0.0034                 | 0.0061                | 0.0020                 | 0.0257         | NS            | -              |

P values reported in red are showed in the corresponding Figures.

**Supplementary Table 3.** BAC clones used for FISH analysis with the description of the chromosomal location, clone name, accession number and corresponding genomic sequence.

| <b>Chromosome 13q</b> |                | <b>GRCh38/hg38 Assembly</b>  |
|-----------------------|----------------|------------------------------|
| <b>Clone</b>          | <b>Acc. N.</b> | <b>Position</b>              |
| RP11-550E22           | AL354820       | chr13: 51,410,490-51,576,476 |
| RP11-39N8             | AL139183       | chr13: 51,576,377-51,625,824 |
| CTD-2251M20           | AQ192444       | chr13: 51,590,022-51,702,487 |
| RP11-147H23           | AL136525       | chr13: 51,625,725-51,771,064 |
| RP11-1140C18          | AQ707170       | chr13: 51,617,197-51,762,535 |
| CTD-3118D17           | AQ338427       | chr13: 51,651,898-51,841,804 |
| RP11-246C15           | AQ490062       | chr13: 51,672,939-51,844,524 |
| CTD-3036L15           | AQ104587       | chr13: 51,661,931-51,768,487 |
| RP11-381L18           | AL138821       | chr13: 51,939,968-51,981,637 |
| <b>Chromosome 19p</b> |                | <b>GRCh38/hg38 Assembly</b>  |
| <b>Clone</b>          | <b>Acc. N.</b> | <b>Position</b>              |
| CTC-312O10            | AC020895       | chr19: 6,840,698-6,980,598   |
| RP11-1137G4           | AC025278       | chr19: 6,908,573-7,044,037   |
| RP11-303B11           | AC068390       | chr19: 6,922,669-6,948,786   |
| CTD-2596O14           | AQ478079       | chr19: 6,953,014-7,136,582   |
| CTB-25J19             | AC010606       | chr19: 7,019,220-7,125,159   |

**Supplementary Table 4.** Loci and genes associated to Split-Hand/Foot malformation with Long Bone Deficiency. For each locus the corresponding references are also reported.

| <b>OMIM ID</b> | <b>Condition</b>                                                                                                     | <b>Inheritance</b> | <b>Locus</b>  | <b>Comments</b>                                                                            | <b>Reference</b> |
|----------------|----------------------------------------------------------------------------------------------------------------------|--------------------|---------------|--------------------------------------------------------------------------------------------|------------------|
| 119100         | Split-Hand/Foot malformation with Long Bone Deficiency 1; SHFLD1                                                     | AD                 | 1q42.2-q43    | <i>Locus</i> identified by genome-wide linkage analysis, no gene candidate gene identified | [5], [6]         |
| 610685         | Split-Hand/Foot malformation with Long Bone Deficiency 2; SHFLD2                                                     | AD                 | 6q14.1        | <i>Locus</i> identified by genome-wide linkage analysis, no gene candidate gene identified | [5], [6]         |
| 612576         | Split-Hand/Foot malformation with Long Bone Deficiency 3; SHFLD3. Chromosome 17p13.3, Telomeric Duplication Syndrome | AD                 | 17p13.3-p13.1 | Identification of duplications of different size encompassing the <i>BHLHA9</i> gene       | [7], [8]         |

## Supplementary Figures Legends

**Supplementary Figure 1.** P73 and P63 isoforms transactivation from REs belonging to *WDFY2* gene by using a yeast-based reporter assay

**A)** Transactivation ability of p73 isoforms in yLFM-*WDFY2* yeast strains containing the reporter gene under the regulation of a promoter (-7.6, -4.3, -3.3 and -0.5) or intron 1 (+12.5, +14.5 and +15.7) RE from the human *WDFY2* gene. The transactivation ability was determined and presented as in Figure 1. **B)** Transactivation ability of p63 isoforms in yLFM-*WDFY2* (-3.3 RE) and yLFM-*WDFY2* (+12.5 RE) yeast strains. The transactivation ability was determined and presented as in Figure 1 but by growing yeast cells for 8 hours in media containing 0.016% or 0.128% Galactose. **C)** Representative western blots showing the expression levels of p63 isoforms in yeast cell lysates derived from the functional assay (0.128% Galactose). PGK1 was used for normalization. Histogram showing the average level of p63 isoforms in yeast from three independent western blot experiments.

**Supplementary Figure 2.** Regulation of *WDFY2* expression by P63 isoforms and P53 in human cells

**A)** Representative western blot showing the level of p63 protein isoforms found in HCT116 *TP53*<sup>-/-</sup> cell lysates following transient co-transfection with the indicated p63 expression vectors and promoter-derived reporter plasmids.  $\beta$ -actin was used for normalization. Histogram showing the average level of p63 isoforms expressed in HCT116 *TP53*<sup>-/-</sup> cells from three independent western blot experiments. **B)** Transactivation ability of p53 on reporter constructs Pr3300 and Pr3300 del-3.3/-0.5 REs in HCT116 *TP53*<sup>-/-</sup> human cells. Renilla luciferase was used to normalize for transfection efficiencies. Data are expressed as in Figure 2. **C)** A representative western blot showing the level of p53 protein found in HCT116 *TP53*<sup>-/-</sup> cell lysates following transient co-transfection of p53 expression vector with the indicated promoter-derived reporter plasmids.  $\beta$ -

Actin was used for normalization. -, empty vector.

### **Supplementary Figure 3.** *WDFY2* alterations in cancer

**A)** *WDFY2* mutations (missense, truncating and other mutations) are shown according to the frequency (Y axis) and the position of the amino acid hit (X axis). *WDFY2* functional domains are indicated as coloured boxes. **B, C)** Genetic events affecting *WDFY2* gene were analysed using the cBioPortal online tool (TCGA). Deletions, amplifications, mutations and fusions were presented as bars according to their specific frequency from the indicated collection cancer studies (indicated in the X axis). The cancer studies were ordered on the basis of the most frequent observed alteration (i.e., deletions in panel B and mutations or amplifications in panel C). The total number of patients is indicated in the brackets.

### **Supplementary Figure 4.** Evaluation of *WDFY2* expression in cancer

**A-D)** Relative expression values (RPKM) of *WDFY2* using RNA-seq data (TCGA\_Pancancer 12) from tumour (green circles) or normal matched tissues (light blue squares) of different origin (LUAD, Lung Adenocarcinoma; BRCA, Breast Cancer; RCC, Renal Clear cell Carcinoma; HNSCC, Head and Neck Squamous Cell Carcinoma). Numerosity of the samples is indicated on each panel (T = Tumour and N = Normal tissues). **E)** Relative expression values (RPKM) of *WDFY2* using an RNA-seq dataset from different subtypes of breast cancer patients. Shown are the medians and the interquartile ranges. \* =  $p < 0.01$  Student's T-test. **F)** A dot plot showing the relative expression values ( $\log_2$  TPM+1) of *WDFY2* using the gene expression profiling interactive analysis database (GEPIA) from several cancer types (red dots) and matched controls (green dots). Medians are marked by a hyphen. Number of cases and controls are presented below the plot. For cancer type abbreviations see the GEPIA website (<http://gepia.cancer-pku.cn/detail.php?gene=WDFY2>); cancer type acronyms are coloured in green when *WDFY2* expression in tumours is significantly lower than in controls. Conversely, cancer type acronyms are

coloured in red.

## REFERENCES

1. Klein, C., et al., *High thermostability and lack of cooperative DNA binding distinguish the p63 core domain from the homologous tumor suppressor p53*. J Biol Chem, 2001. **276**(40): p. 37390-401.
2. Marengo, B., et al., *Etoposide-resistance in a neuroblastoma model cell line is associated with 13q14.3 mono-allelic deletion and miRNA-15a/16-1 down-regulation*. Sci Rep, 2018. **8**(1): p. 13762.
3. Flaman, J.M., et al., *A simple p53 functional assay for screening cell lines, blood, and tumors*. Proc Natl Acad Sci U S A, 1995. **92**(9): p. 3963-7.
4. Monti, P., et al., *N-P63alpha and TA-P63alpha exhibit intrinsic differences in transactivation specificities that depend on distinct features of DNA target sites*. Oncotarget, 2014. **5**(8): p. 2116-30.
5. Naveed, M., et al., *Ectrodactyly with aplasia of long bones (OMIM; 119100) in a large inbred Arab family with an apparent autosomal dominant inheritance and reduced penetrance: clinical and genetic analysis*. Am J Med Genet A, 2006. **140**(13): p. 1440-6.
6. Naveed, M., et al., *Genomewide linkage scan for split-hand/foot malformation with long-bone deficiency in a large Arab family identifies two novel susceptibility loci on chromosomes 1q42.2-q43 and 6q14.1*. Am J Hum Genet, 2007. **80**(1): p. 105-11.
7. Klopocki, E., et al., *Duplications of BHLHA9 are associated with ectrodactyly and tibia hemimelia inherited in non-Mendelian fashion*. J Med Genet, 2012. **49**(2): p. 119-25.
8. Paththinige, C.S., et al., *Split hand/foot malformation with long bone deficiency associated with BHLHA9 gene duplication: a case report and review of literature*. BMC Med Genet, 2019. **20**(1): p. 108.
